# Supplementary material
Source: publisher figshare collection journal article supplement (https://sage.figshare.com/ndownloader/files/20556612)
Supplement: Supplementary file 1 [file 20556612]

## **Appendix: Interview Questions**

1. What types of organizations provide support for you to assist in caring for your adult child with ASD?
2. What types of support do you receive from each of these organizations? (e.g., financial, help with physical care of the adult, respite care, etc.)
3. Are you satisfied with the help you are receiving? If no, what is lacking and how can it be improved?
4. How does caring for your adult child with ASD affect your personal health?
5. Where does your adult child with ASD live?
  - a. How has having an adult child with ASD living with you affected your quality of life? Or
  - b. How has having an adult child with ASD living (independently or in a group home) affected your quality of life?
6. What is the most challenging aspect of caring for your adult child with ASD?
7. What is the most rewarding aspect of caring for your adult child with ASD?
8. How has having an adult child with ASD affected your finances now and in the future?
9. Do you have any additional comments about caring for an adult child with ASD?
